# Supplementary material for: Kaposi's Sarcoma-Associated Herpesvirus Hijacks RNA Polymerase II To Create a Viral Transcriptional Factory
Source: PubMed Central journal article supplement (PMC5432858; doi:10.1128/jvi.02491-16), 2017-05-12
Supplement: JVI.02491-16_zjv999182629s1.pdf [file JVI.02491-16_zjv999182629s1.pdf]

### Supplemental 1 Table . Primers used for real-time PCR

| Primer name and orientation | Sequence (5' -> 3')    |
|-----------------------------|------------------------|
| K-Rta promoter, F.....      | AGCCAGCGTATGCTTCAGG    |
| K-Rta promoter, R.....      | TGCCTGGACAGTATTCTCACA  |
| PAN RNA promoter, F.....    | GGTGGCTAACCTGTCCAAAA   |
| PAN RNA promoter, R.....    | CAGCGAGCACAAAATCCATA   |
| Actin, F.....               | AGAAGTCGCAGGACCACT     |
| Actin, R.....               | GTAGAGCCCACCTTCCTTCC   |
| RNA pol II, F.....          | CGCTGTGTCTGCTTCTTCTG   |
| RNA pol II, R.....          | ACCCTCGCATATGTTTTTGC   |
| IL-6, F.....                | CACACAGACAGCCACTCACC   |
| IL-6, R.....                | TTTTCTGCCAGTGCCTCTTT   |
| IL-10, F.....               | TGGTGAAACCCCGTCTCTAC   |
| IL-10, R.....               | . TTCCATCTCCTGGGTTCAAG |
| GAPDH, F.....               | TCGCTCTCTGCTCCTCCTGTTC |
| GAPDH, R.....               | . CGCCCAATACGACCAAATCC |

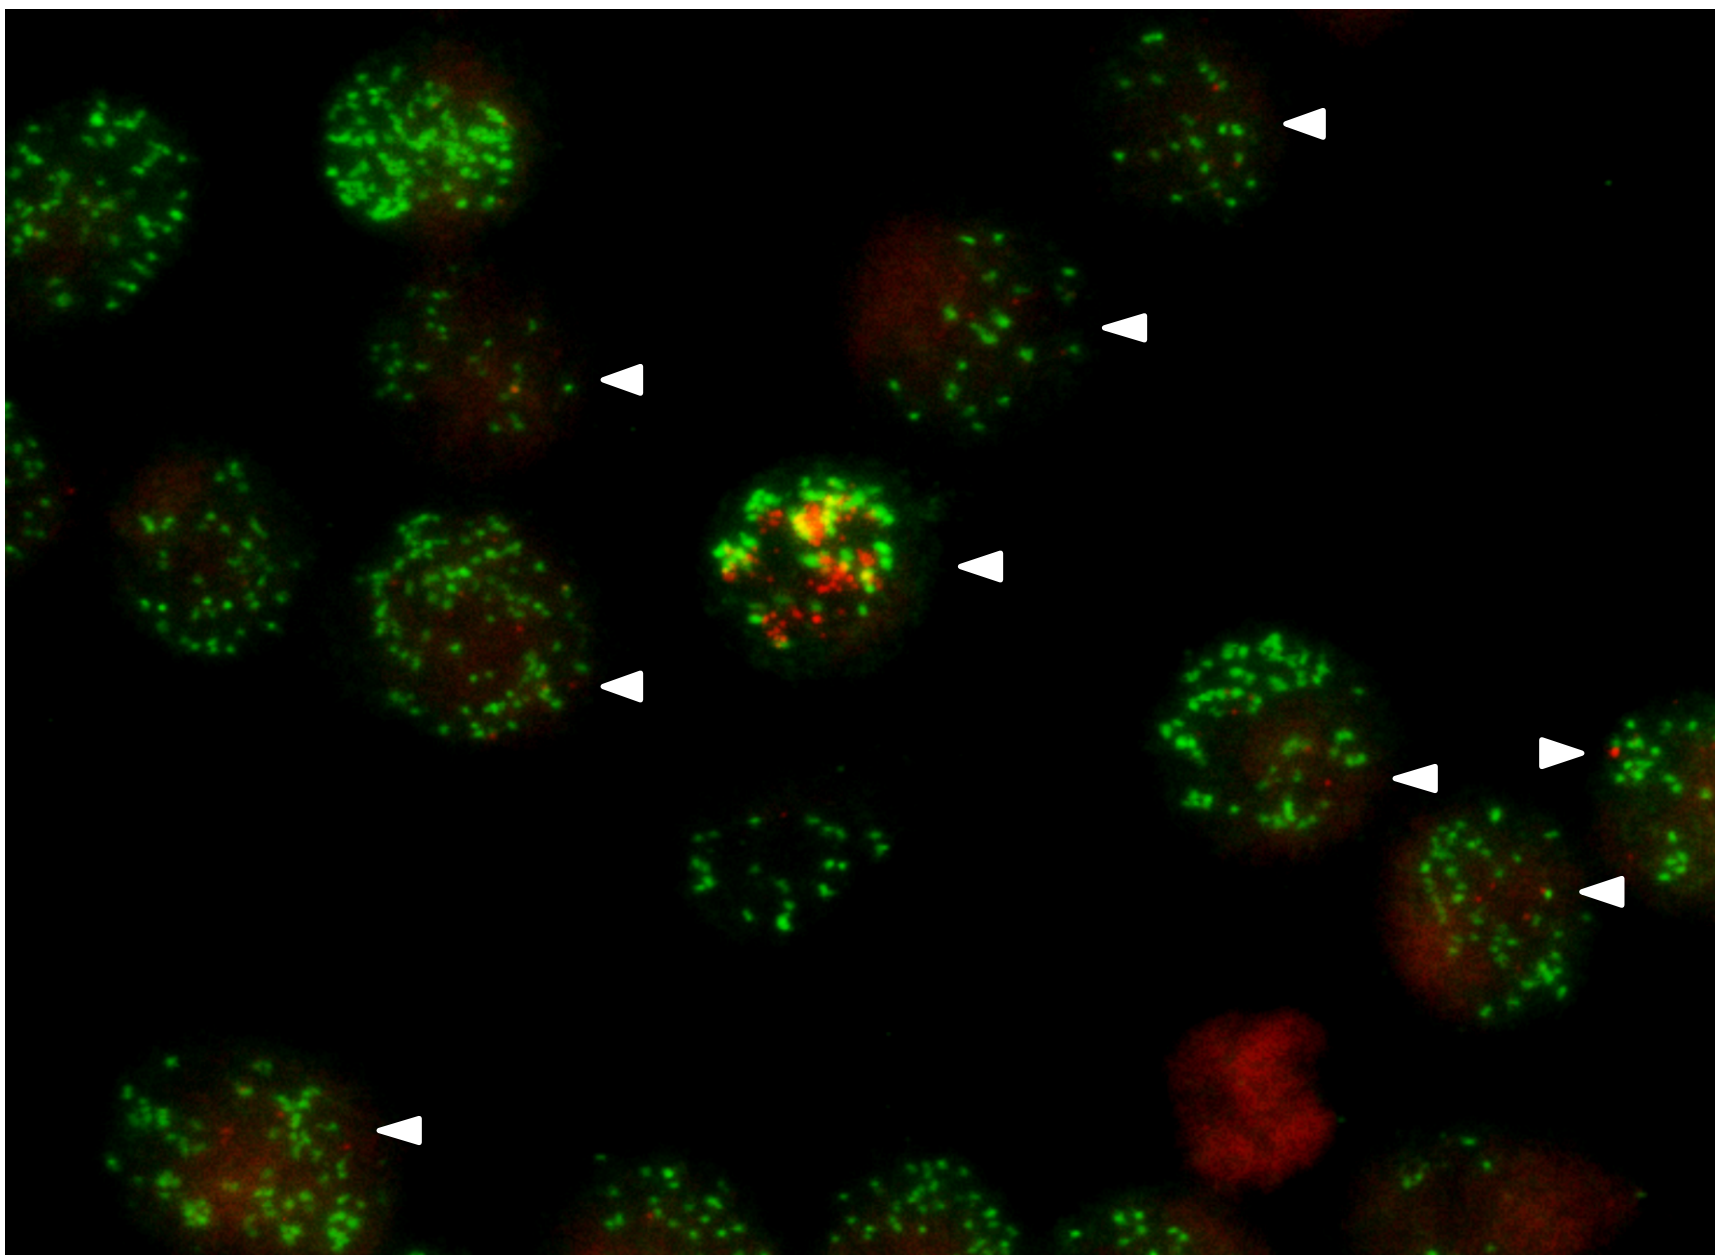

**S1 Figure: Adjacent localization of LANA and K-Rta RNA.** Picture presented in Figure 1 was enlarged for clearer view of adjacent localization. Immune-FISH was performed by probing K-Rta RNA (Red) and immune-staining of LANA protein (Green). Not all of episomes in a PEL cell are transcribing K-Rta RNA. BCBL-1 cells expressing K-Rta RNA is marked in white arrows.

**A**

BCBL-1

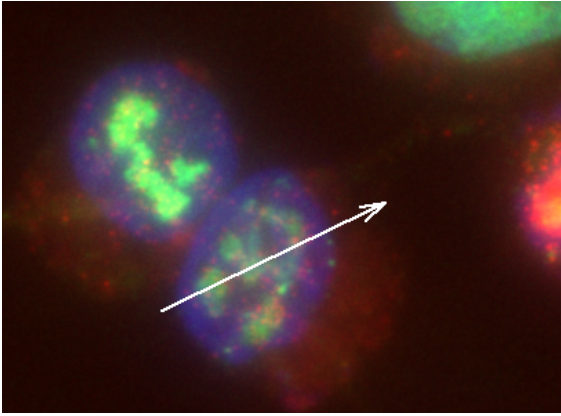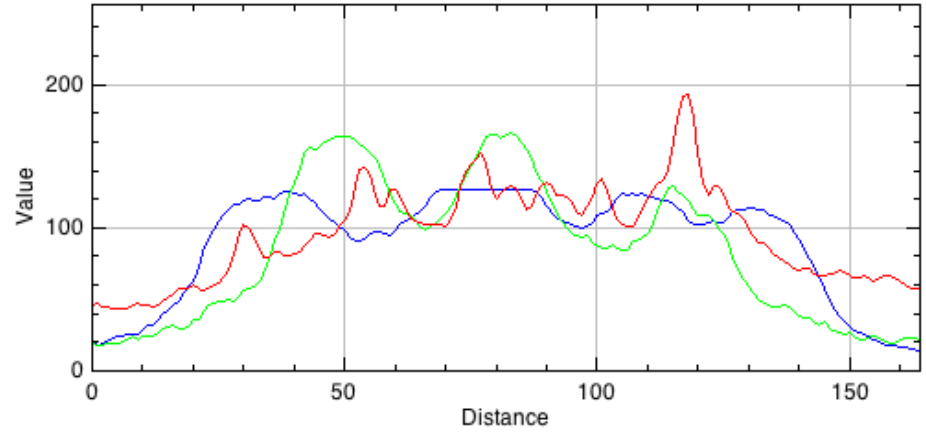

BC2

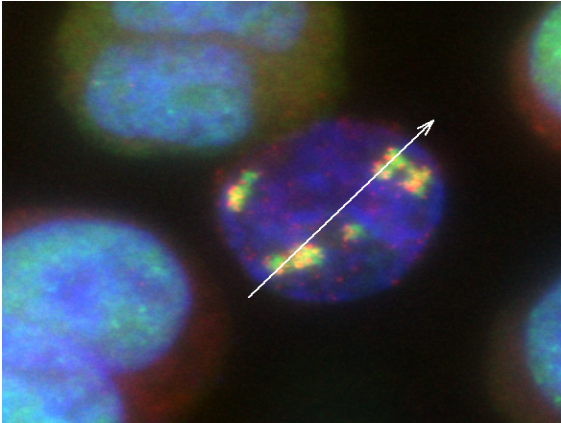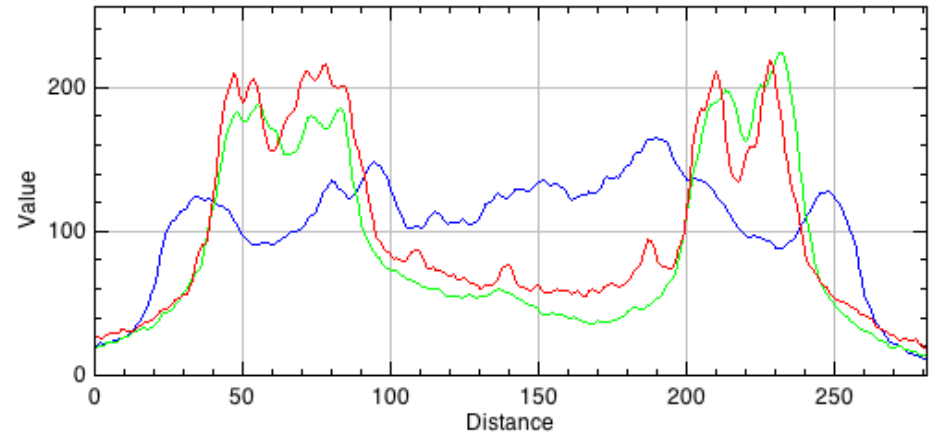

HBL-6

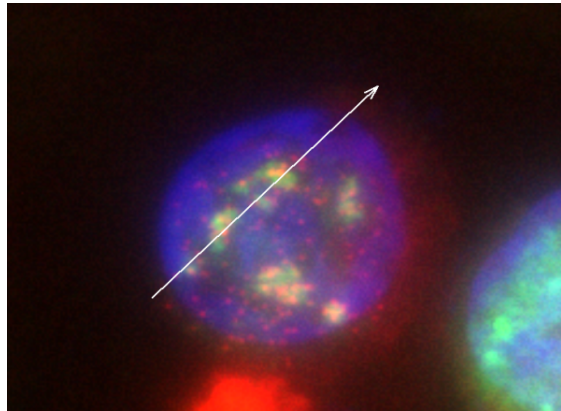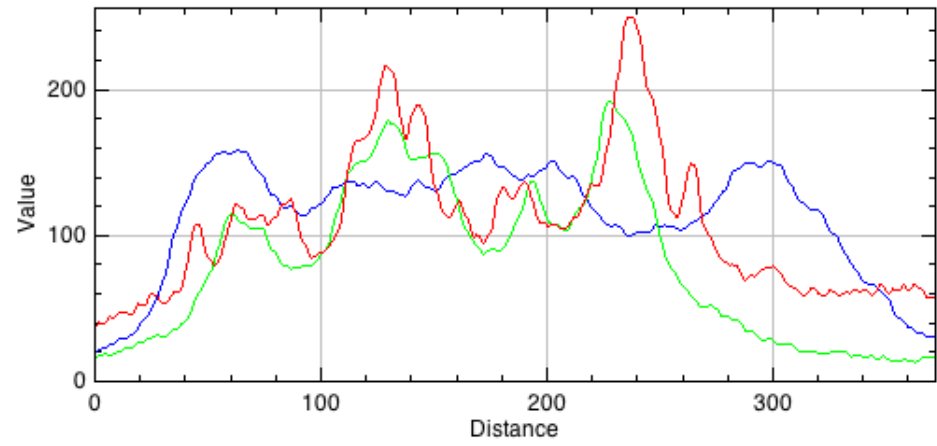

# B BCBL-1 (TPA & NaB, 28 hr)

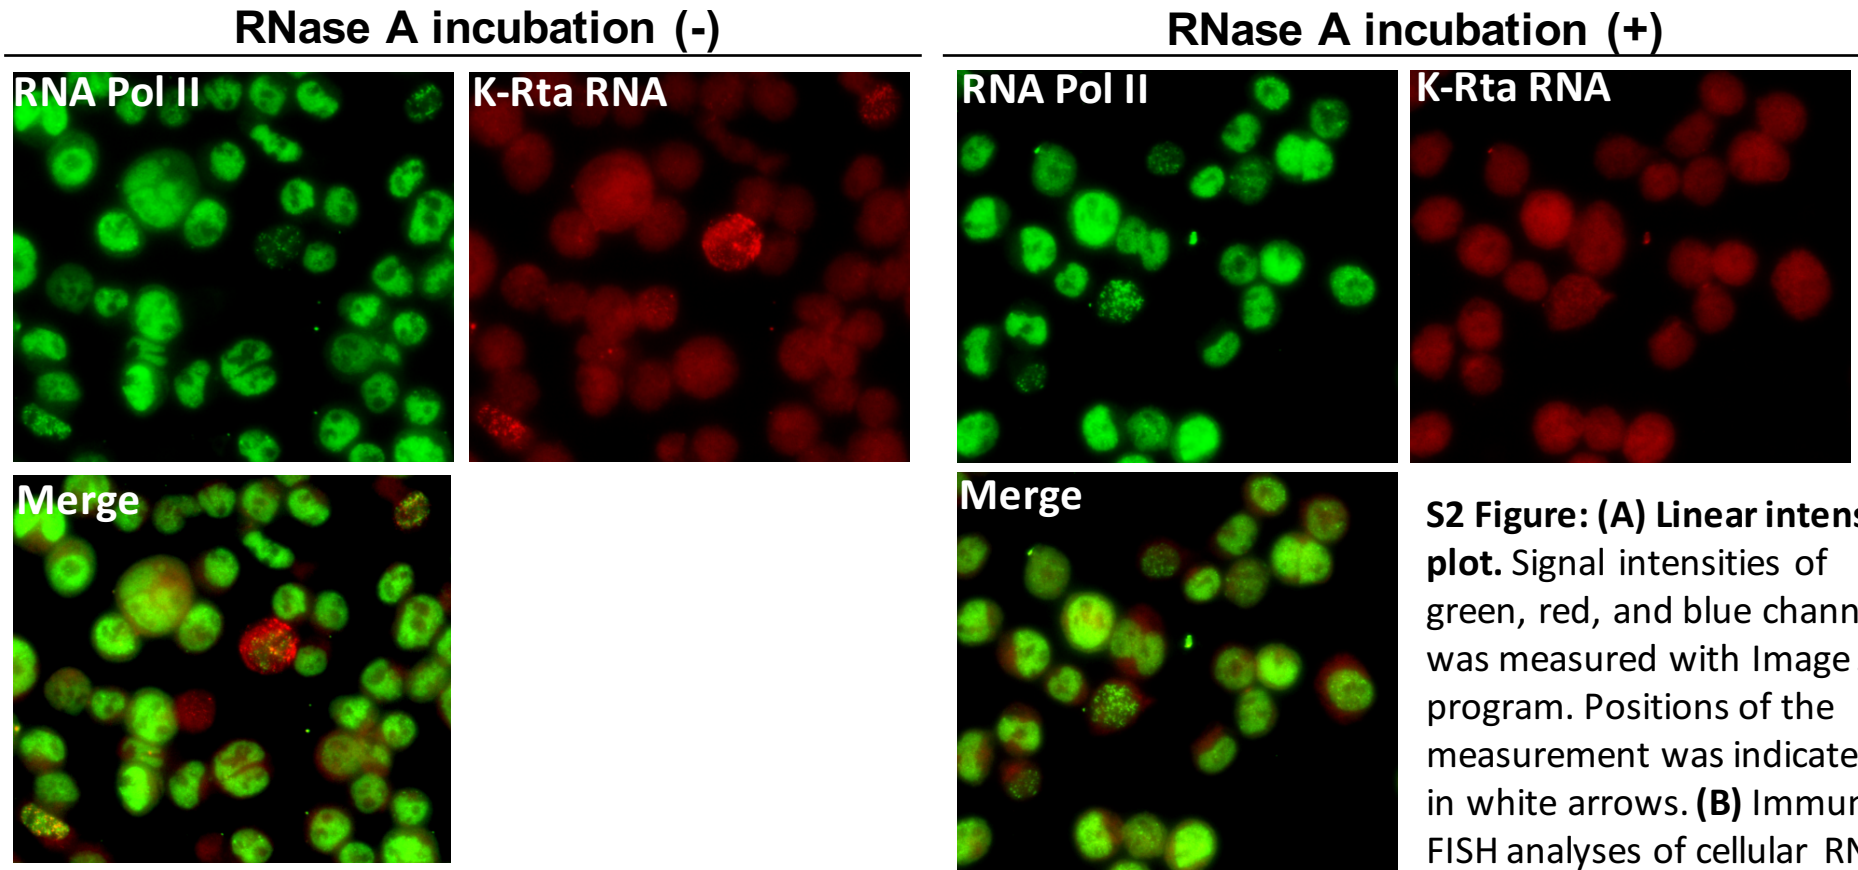

**S2 Figure: (A) Linear intensity plot.** Signal intensities of green, red, and blue channel was measured with Image J program. Positions of the measurement was indicated in white arrows. **(B)** Immune-FISH analyses of cellular RNA polymerase II and K-Rta RNA with BCBL-1. RNase A treatment diminished K-Rta RNA signals, which were expected to see where RNA polymerase II formed “dot-like” structures. **(C)** KSHV negative BJAB cells did not show K-Rta RNA signals. Green: RNA polymerase II, Red: K-Rta RNA FISH signals.

# C BJAB

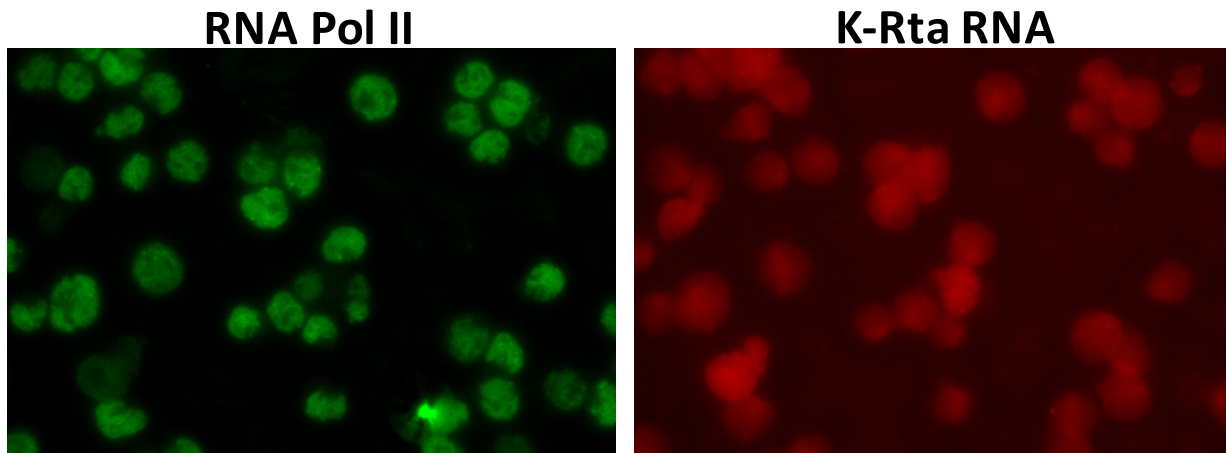

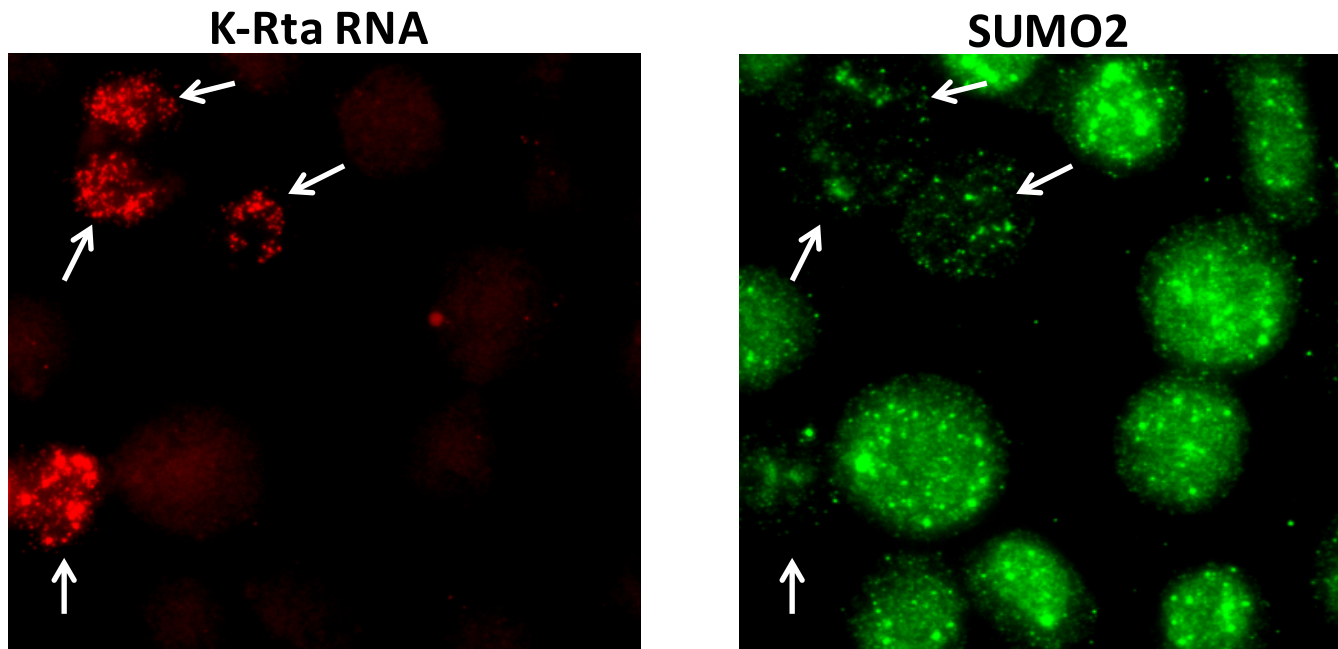

**S3 Figure: Effects of RNA polymerase II translocation on SUMO.** Cellular SUMO-2/3 modified proteins and/or SUMO-2/3 moiety were eliminated in KSHV reactivating cells. Immune-FISH were performed with an antibody, which recognizes both cellular SUMO-2 and SUMO-3 protein. Combination of K-Rta mediated SUMO degradation and inhibition of newly transcribing SUMO-2/3 may account for the global elimination of SUMO2/3 signals in KSHV reactivating cells.

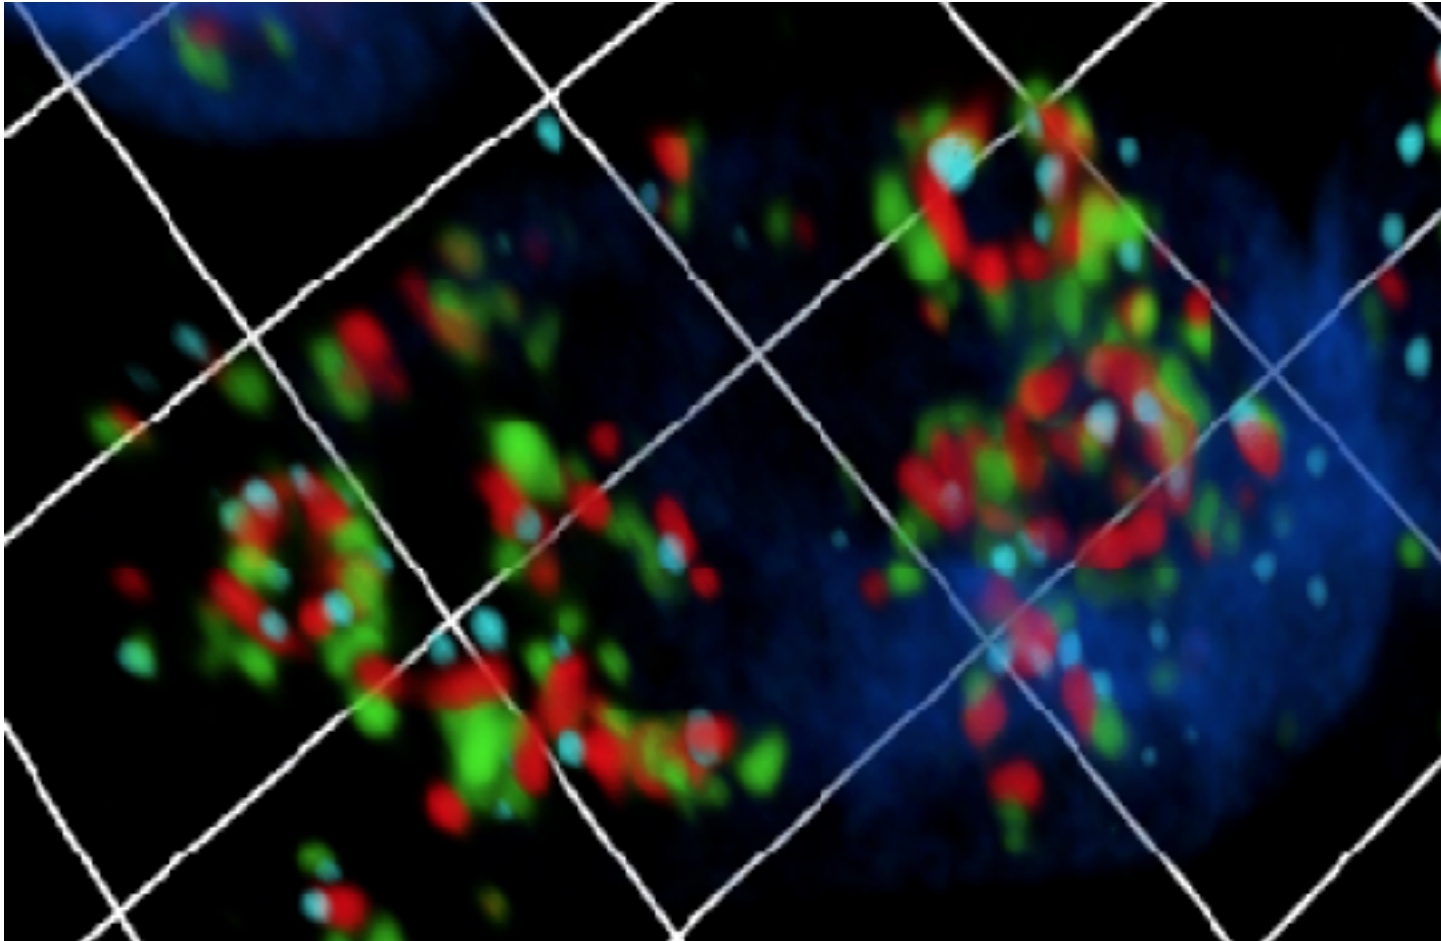

**S4 Figure:** Higher magnification view of KSHV transcriptional factories. Immune-FISH was performed with BCBL-1 cells. Green: LANA, Red: RNA polymerase, Light blue: K-Rta RNA.

## BCBL-1, RNase A treated

---

KSHV DNAs

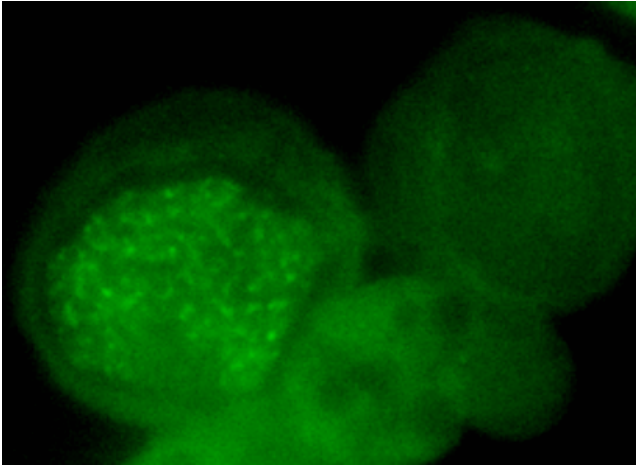

DAPI

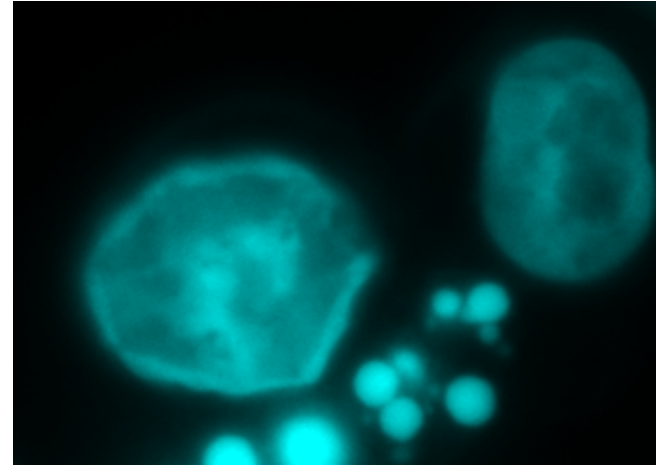

**S5 Figure. DNA-FISH.** BCBL-1 cells were reactivated by TPA and sodium butyrate for 48 hours. RNase A treated slide was probed with terminal repeat targeting oligos.

## KSHV reactivation with TPA and Dox

---

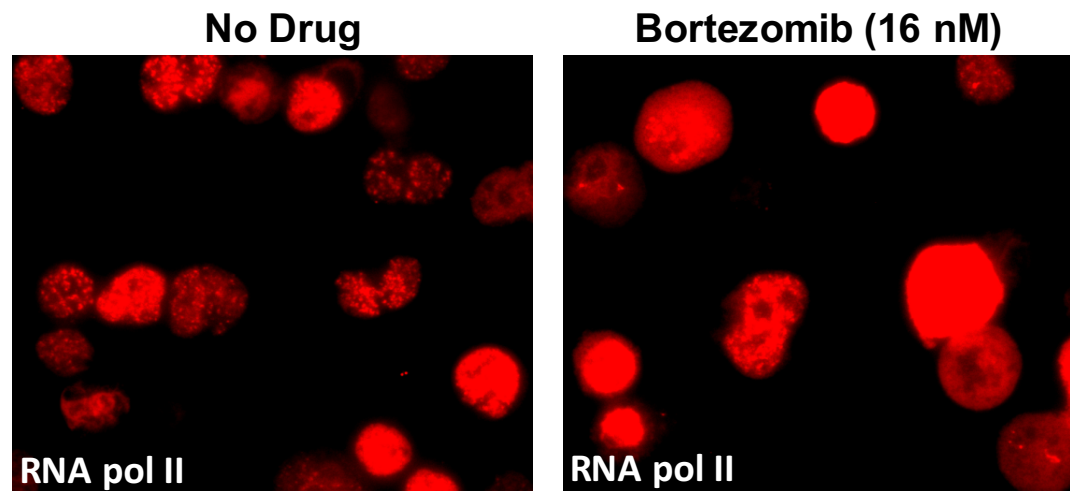

**S6 Figure:** Inhibition of transcriptional factory formation by proteasome inhibitor. IFA was performed with anti-RNA pol II. KSHV failed to form clear punctate RNA Pol II dots in nucleus in presence of Bortezomib (16 nM).
